# Supplementary material
Source: publisher figshare collection journal article supplement (https://gsajournals.figshare.com/ndownloader/files/28005744)
Supplement: Supplementary file 1 [file 28005744]

**
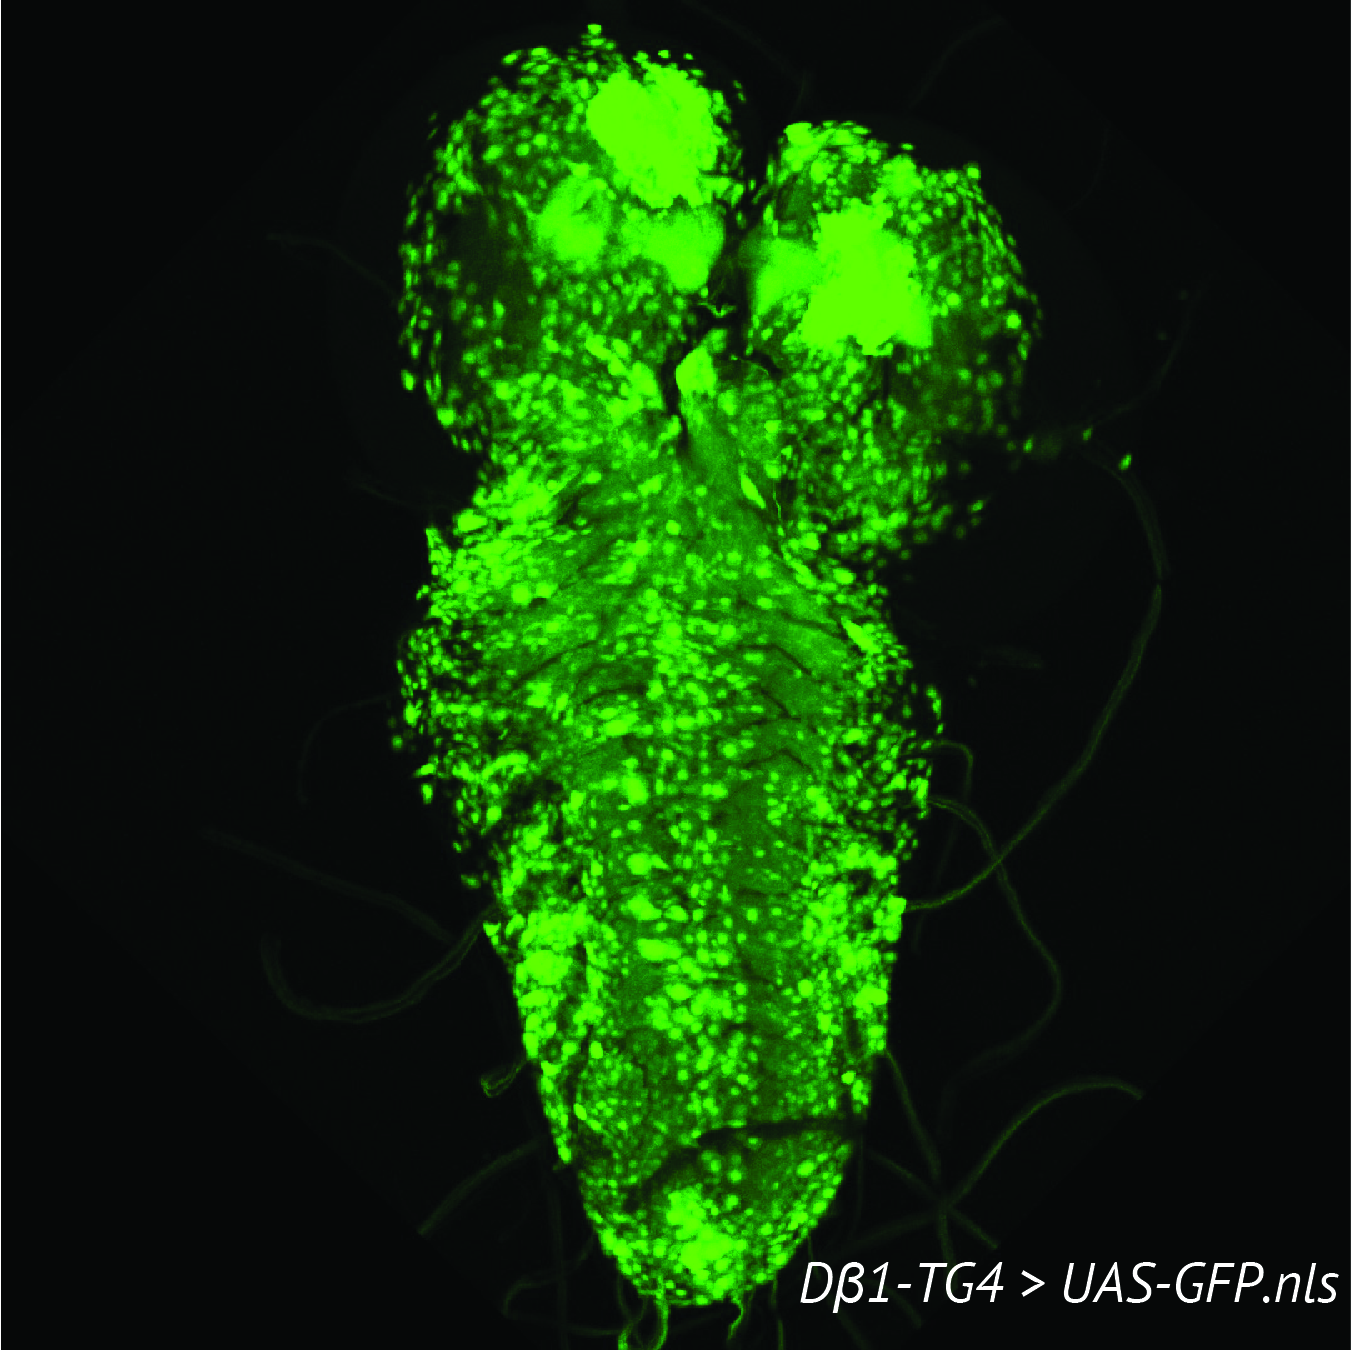
**

**Figure S5 Expression pattern of *Dβ1-*TG4 in larval brain**

Virgin *Dβ1-*TG4 females were crossed to UAS-GFP.nls reporter males and brains dissected from offspring in the wandering third instar larval stage. Widespread expression was detected in the brain lobes and ventral nerve cord.
